# 1 Hypothermia is a characteristic of the fungal kingdom

2 Radames JB Cordero and Arturo Casadevall

3 Department of Molecular Microbiology and Immunology, Johns Hopkins Bloomberg School of Public  
4 Health, 615 North Wolfe Street, Baltimore, MD 21205, USA

5 \* [acasade1@jhu.edu](mailto:acasade1@jhu.edu)

6 **Email:** [acasade1@jhu.edu](mailto:acasade1@jhu.edu)

7

8 RJBC: [0000-0002-3026-7094](tel:0000-0002-3026-7094); AC: [0000-0002-9402-9167](tel:0000-0002-9402-9167)

9

## 10 **Article Category**

11 Microbiology

## 12 **Keywords**

13 thermal microbiology, infrared imaging, microbial thermoregulation, condensation, transpiration

## 14 **Author Contributions**

15 RC conceived the original idea, carried out the experiments, and wrote the manuscript with support from  
16 AC. AC supervised the project.

17

## 18 **This PDF file includes:**

19 Main Text

20 Figures 1 to 4

21 Supplemental Information includes 3 tables and 6 figures.

## 22 **Abstract**

23 Fungi play essential roles in global ecology and economy, but their thermal biology is widely  
24 unknown. Infrared imaging revealed that mushrooms, yeasts, and molds each maintained colder  
25 temperatures than their surroundings. Fungal specimens are to be ~2.5 °C colder than the surrounding  
26 temperature. Time-lapse infrared images of *Pleurotus ostreatus* revealed hypothermia throughout  
27 mushroom growth and after detachment from mycelium. The hymenium was coldest, and different areas  
28 of the mushroom exhibit distinct thermal changes during heating and cooling. The fruiting area in the  
29 mycelium remained relatively cold following mushroom detachment. Analyses of *Agaricus*  
30 *bisporus* mushroom pilei confirmed that the mechanism for mushroom hypothermia depends on  
31 evaporative cooling. We also assessed evaporative cooling in biofilms of *Cryptococcus neoformans*,  
32 and *Penicillium* spp. molds based on the accumulation of condensed water droplets on the lids over  
33 biofilms grown on agar media plates. Biofilms of *C. neoformans* acapsular mutant showed more  
34 transpiration and were colder than wildtype. *Penicillium* biofilms appear to transpire ten times more than  
35 the supporting agar. We used the evaporative cooling capacity of mushrooms to construct a mushroom-  
36 based air-cooling system (MycoCooler™) capable of passively reducing the temperature of a closed  
37 compartment by approximately 10 °C in 25 minutes. This study suggests that hypothermia is a  
38 characteristic of the fungal kingdom. Since fungi make up ~2% of Earth biomass, their ability to dissipate  
39 heat may contribute significantly to planetary temperatures in local environments. These findings are  
40 relevant to the current global warming crisis and suggest that large-scale myco-cultures could help  
41 mitigate increasing planetary temperature.

## 42 Introduction

43 Temperature controls the growth, reproduction, and dispersal of all life forms. The temperature of  
44 an organism depends on the balance between gaining and dissipating heat as it is influenced by its total  
45 environment (i.e., physical-chemical, biotic-abiotic, micro-macro dimensions) (1). In theory, if the  
46 organism gains more thermal energy than it dissipates, it becomes warmer. If more thermal energy is lost,  
47 the organism may reach colder temperatures than its surroundings. When the organism and the  
48 environment each have the same temperature, there is no heat flow; hence the organism is in thermal  
49 equilibrium. Living organisms are considered dissipative systems that exist far from thermodynamic  
50 equilibrium (2); that could mean warmer or colder, but not equal to the surroundings.

51 Organisms can be classified based on their capacity to maintain their body temperatures relative  
52 to their environment. Endothermic organisms (alias 'warm-blooded'), like birds and mammals, can  
53 maintain relatively constant internal temperatures that range from 36 to 40 °C, regardless of any  
54 fluctuations in outside temperature. Most life forms are, however, *ectothermic* (alias 'cold-blooded')  
55 because their internal temperatures fluctuate based on external temperatures. Much of the energy driving  
56 ectotherm metabolism comes from their surroundings, capturing heat from radiation energy via pigments  
57 like melanin (1). Plants makeup ~80% of Earth biomass (3) and may be considered the "epitome of  
58 poikilothermy" because these are frequently found in environments that are subject to wide variations in  
59 temperature and, contrary to reptiles or fish, cannot displace to more favorable thermal environments  
60 when needed (4). To prevent overheating, plants and animals, give off heat via the evaporation of water  
61 at their surfaces in a process known as evaporative cooling, transpiration, or evapotranspiration. The  
62 evaporation of water is an endothermic process that consumes thermal energy to break hydrogen bonds  
63 when water goes from liquid to a gas. Cellular structures like animal sweat glands and plant stomas  
64 regulate the water transpiration process. Depending on the thermal environmental conditions, leaves can  
65 dissipate heat via evaporative cooling and become colder than air temperature (5–7). Fungal, protist,  
66 archaeal, and bacterial communities are assumed to be ectothermic considering their relatively simpler  
67 physiology and small size or high surface area-volume ratio, however, the temperature of microbial  
68 communities and the mechanisms of heat exchange with their surroundings are unknown.

69 In geologic history, the fungi pioneered the colonization of land and today play a central role in  
70 balancing Earth's ecology by breaking down decaying biological matter and providing nutrients for new  
71 growth. Fungal organisms can survive almost anywhere and are a source of food, medicines, and a  
72 variety of biomaterials. Fungi come in the forms of microscopic to macroscopic mushroom-producing  
73 mycelium, yeasts, and molds communities. The fungal kingdom also includes species that are pathogenic  
74 to animal and plant flora, causing severe public health and agricultural problems. Mushrooms, the  
75 reproductive structure of fungal mycelium, are usually formed by a stem or stalk and a cap or pileus. Pilei  
76 are often convex but can also form other shapes during development and between species. The area  
77 underneath the pilei, the hymenium, consists of lamellae gills or porous surfaces bearing spores. The

78 lamellar constitution of the hymenium can increase the surface area of mushrooms by 20 folds (8). The  
79 structural organization of the hymenium is important for spore production and spore release.

80 Mushroom pilei were noted to be cold relative to their surroundings (9–12). The first study  
81 inserted thermocouple detectors into mushrooms and suggested that the relatively cold temperatures  
82 were mediated by evaporative cooling (11). Quantitative data of mushroom transpiration was provided in  
83 subsequent studies (9, 10). Mahajan et al. quantified the transpiration rate of *A. bisporous* whole  
84 mushrooms and developed a mathematical model to link mushroom water loss with ambient temperature  
85 and relative humidity (9). Subsequently, Dressaire et al. quantified the rate of water loss from mushroom  
86 pilei, which can be higher than plants and enough to cool the surrounding air by several degrees Celsius  
87 (10).

88 In this study, we applied infrared imaging to measure the temperature of wild mushrooms, as well  
89 as molds and yeasts biofilms/colonies under a variety of conditions. Our findings extend the observation  
90 that fungi are hypothermic to unicellular organisms through a common mechanism that involves cooling  
91 from the evaporation of fungal-associated water.

## 92 Results

### 93 **Mushrooms, yeasts, and molds maintain colder temperatures than their surroundings.**

94 Thermal imaging of 21 wildlife mushroom species revealed that each was colder than their natural  
95 environment (**Fig. 1 a-f** and **Table S1**). The temperature of stalks recorded for some wild specimens was  
96 similar to the pilei. Yeast colonies and mold biofilms  
97 of *Candida* spp., *Cladosporium* spp., *Penicillium* spp., and *Rhodotorula mucilagenosa* also exhibited  
98 lower temperatures than the surrounding agar media following 1 h incubation at 45 °C (**Fig. 1 g-j**). The  
99 temperature differences between the fungus and its surroundings averaged ~2.5 °C and varied from ~0.5  
100 to 5 °C, depending on the fungal specimen (**Fig. 1 k**). The mushrooms of *P. ostreatus* and *Cerrena*  
101 *unicolor* showed larger temperature differences; ~5 °C cooler than ambient temperature. The  
102 temperatures of all fungal specimens correlated linearly with surrounding temperatures at a slope of 1  
103 and x, y-intercepts of ~2 °C (**Fig S1**).

104 **Change in mushroom temperature during fruiting, heating, and cooling.** *Pleurotus*  
105 *ostreatus* grown in the laboratory at 25 °C revealed coldness throughout the whole fruiting process (**Fig. 2**  
106 **a**). We recorded colder temperatures over time, as the mushroom flush grew in size. The mushroom flush  
107 remained relatively cold after detachment, although several degrees warmer. The gills area underneath  
108 the pileus or hymenium appeared colder than the frontal side of *P. ostreatus* pilei or stalk (**Fig. 2 b**).  
109 Notably, the fruiting site of the mycelium also remained relatively cold after mushroom detachment,  
110 approximately 2.5 °C cooler than the rest (**Fig. 2 b**). The relatively cold temperature of the *P. ostreatus*  
111 mushroom was maintained during heating, increasing from approximately 19 to 27 °C following 137  
112 minutes incubation at 37 °C (<10 % relative humidity, RH) (**Fig. 2 c**). After heating, the mushroom flush  
113 was incubated at 4 °C (<10 % RH), and its temperature dropped from 24 to 18 °C after 104 minutes (**Fig.**  
114 **2 d**). A comparison of the thermal images of the mushroom flush during heating and cooling incubations  
115 showed that different areas of the mushroom dissipate heat differently. The changes in mushroom  
116 temperature during cooling manifested more irregular thermal gradients when compared to the heating  
117 incubation (**Fig S2**). The change in average mushroom temperature as a function of time followed an  
118 exponential curve during heating but a linear curve during cooling (**Fig S3**).

119 **Fungal hypothermia is mediated by evaporative cooling.** Evaporative cooling was confirmed  
120 in light and dark *A. bisporus* mushroom pilei by manipulating its water content and ambient temperature-  
121 humidity. Dehydrated mushrooms are no longer able to maintain relative colder temperatures,  
122 irrespective of ambient temperature (**Fig S4 a-c** and **Table S2**). We observed similar temperature  
123 changes between light and dark mushrooms pilei. The percent mass loss of light and dark *A.*  
124 *bisporus* mushroom pilei following dehydration was  $93.6 \pm 0.4$  % w/w (**Table S3**), demonstrating their  
125 high-water content. Dehydration of seven additional wild fungal unidentified specimens also shows high  
126 water content ranging from 57 to 92 percent by mass (**Table S3**). Mushrooms warmed slower and  
127 reached lower absolute temperatures under a dry environment as compared to a humid environment (**Fig**

128 **S4 d&e**). Together these results confirmed that mushroom's relative coldness was mediated by  
129 evaporative cooling.

130 Evaporative cooling in yeast and molds was evident from the condensation of water droplets on  
131 the lids above *Cryptococcus neoformans* and *Penicillium* spp. biofilms were grown upright on agar plates  
132 (**Fig. 3**). An acapsular mutant of *C. neoformans* showed more and larger water droplets than the  
133 encapsulated wildtype strain (**Fig. 3 a&b**). The encapsulated *C. neoformans* colonies are ~90% water,  
134 while the acapsular mutant is ~82% (**Table S3**). The mutant strain was also ~1 °C colder than the  
135 encapsulated strain. Biofilms of *Penicillium* spp. showed significant condensation of water droplets (**Fig.**  
136 **3c**), at least ~10 times higher than the surrounding 1.5% agar medium (**Table S4**).

137 **A mushroom-based air-cooling device.** **Figure 4 a** show a diagram of a mushroom-based air-  
138 cooling device. We called this prototype device MycoCooler™, which was constructed using a Styrofoam  
139 box with a 1-cm diameter inlet aperture and a 2-cm diameter outlet aperture (**Fig S5 a**). An exhaust fan  
140 was attached outside the outlet aperture to drive airflow in and out of the box (**Fig. S5 b**). The  
141 MycoCooler™ was loaded with ~420 grams of *A. bisporus* mushrooms, closed, and placed inside a larger  
142 Styrofoam box (**Fig S5 c**) previously equilibrated inside a warm room (37 °C, <10% RH). Forty minutes  
143 after the addition of mushrooms, the temperature inside the closed Styrofoam box decreased  
144 approximately 10 °C at ~0.4 °C per min, and the humidity increased to ~45% at 1.3 % per min (**Fig 4 b**).  
145 While the humidity continued to increase, the air temperature reached a minimum at ~60% RH, at which  
146 point it started to increase back to initial temperature values (**Fig 4 b**). From this data, we estimated that  
147 420 grams of *A. bisporus* mushroom pilei have an air-cooling capacity of approximately 20 Watts or 68  
148 BTH/hr. The change in air temperature was proportional to change in humidity, confirming evaporative  
149 cooling as the mechanism for mushroom hypothermia. Our MycoCooler device provides a proof-of-  
150 principle for harnessing mushroom's cooling capacity for cooling air in enclosed environments.

## 151 Discussion

152 This thermographic study reveals that mushrooms, molds, and yeast can maintain colder  
153 temperatures than their environment, implying that hypothermia is a general property of the fungal world.  
154 Mushroom coldness occurred throughout the fruiting process, and the fruiting area of mycelium also  
155 became relatively cold. We also confirm that mushroom coldness occurs via transpiration and that this  
156 process also occurs in mold and yeast biofilms. Finally, we provide a proof-of-principle demonstration for  
157 a mushroom-based air-conditioning device capable of passively cooling and humidifying the air of a  
158 closed environment. The data presented here reveal the cold nature of fungal biology and evaporative  
159 cooling as a microbiological mechanism of thermoregulation.

160 The observation that fungal temperatures correlated to ambient temperature are consistent with  
161 the notion that fungi are poikilotherms. The cold temperatures of wild mushroom specimens relative to  
162 ambient temperature suggest that mushrooms are very effective at dissipating heat. The temperature of  
163 wild mushroom pilei varied between specimens, which suggests that there are species-specific capacities  
164 to dissipate heat that must be related to differences in still unknown thermal properties (i.e., heat capacity,  
165 thermal conductivity). The relatively cold temperatures of yeast colonies and mold biofilms were only  
166 visible after incubation in a warm/dry environment. At steady states in ambient temperature, our infrared  
167 imaging contrasting resolution was not sufficient to detect temperature differences between the  
168 colony/biofilm and the surrounding agar. The temperature difference becomes apparent as yeast colonies  
169 and mold biofilms can dissipate more heat than the surrounding agar, which is ~98 % water. Although we  
170 could not find any examples, we do not rule out the existence of mushrooms, yeasts, or molds capable of  
171 reaching warmer temperatures than their surroundings. Factors such as pigmentation and radiation  
172 exposure can influence fungal temperatures. Unicellular yeasts and mushrooms produce pigments, such  
173 as melanins, that can increase heat capture from radiation energy (13–15). For instance, approximately 1  
174 gram of darkly pigmented yeasts can reach >5 °C warmer than the ambient temperature within minutes of  
175 sunlight exposure (13). The identification of heat-producing bacteria (16) suggests that a microbial  
176 community can produce enough thermal energy and maintain warmer temperatures than the  
177 surroundings. More thermal information of microbial specimens is needed to reveal any potential thermal  
178 patterns between fungal genera, species, and lifestyles.

179 The mushroom coldness was observed during the whole *P. ostreatus* fruiting process. The  
180 decrease in temperature during fruiting appeared to be proportional to the mushroom size, which is likely  
181 related to an increase in mushroom thermal mass or to an unknown age-related structural organization  
182 mediating more heat loss. The observation that the mushroom is coldest when still attached to the  
183 mycelium is consistent with prior observations (10, 11) and indicates that heat loss is highest when  
184 connected to the mycelial network, which provides access to water. This increase in temperature after  
185 detachment is also observed in leaves (17). The observation that the fruiting site of mycelium remained  
186 relatively cold after mushroom detachment suggests that mushroom heat loss translates to the mycelium  
187 level. The thermal images of *P. ostreatus* mushroom also suggest that heat dissipation is more efficient at

188 certain discrete areas on the mushroom flush. The relatively cold temperatures recorded underneath the  
189 mushroom cap make sense considering the relatively high surface area exposed by the gills (8). The  
190 different spatiotemporal changes in mushroom temperature during heating and cooling incubations  
191 suggests that discrete areas of the mushroom are more efficient at gaining or dissipating heat. Different  
192 areas of the mushroom may contain different hyphal structural organizations and/or water content  
193 affecting transpiration rates and thermal properties. The change in *P. ostreatus* mushroom average  
194 temperature during heating and cooling resembles the phenomena of thermal hysteresis, a process  
195 where previous heat dissipation events influence subsequent heat exchanges and temperature changes.

196 Our data shows that fungal hypothermia is mediated via the evaporation of fungal-associated water.  
197 In plants, transpiration occurs mainly at the leaf level and is regulated via stomas, but any analogous  
198 structure in mushrooms has not been identified. Our data with light and dark *A. bisporus* mushroom pilei  
199 confirm that evaporative cooling accounts for mushroom coldness. Both light and dark mushroom pilei  
200 exhibited similar temperature changes, which suggest that pigmentation has an effect too close to our  
201 limits of thermal detection or no effect on heat dissipation in mushroom pilei. The high-water content of  
202 mushrooms is consistent with previous reports (18) and explains their high transpiration capacity (10).  
203 Their high-water content implies that mushroom's thermal properties must be close to those of liquid  
204 water. Other fruits are also highly hydrated (i.e., cucumber); however, it is unknown how their  
205 transpiration rate compares to those of mushrooms.

206 Our data on yeast and molds biofilms also suggest that evaporative cooling accounts for their  
207 relatively cold temperatures. The condensed water on the plastic cover above yeast and molds biofilms  
208 provides evidence for evaporative cooling. The difference in water content between the encapsulated and  
209 acapsular mutant colonies of *Cryptococcus* can be explained by the capsule, which is mostly water (19).  
210 Although the acapsular mutant of *C. neoformans* contains ~10% less water mass, it shows more water  
211 condensation and colder temperatures relative to the encapsulated strain. The data suggest that the  
212 capsule can retain water from evaporating, which would be consistent with the proposed role of microbial  
213 capsules in preventing desiccation in the environment (20). The observed differences between a normal  
214 and a mutant of *Cryptococcus* biofilms also suggest that water condensation and biofilm temperature may  
215 serve as proxies in genome-wide genetic screens for the identification of molecular mechanisms of  
216 thermoregulation in yeast.

217 What is the biological advantage of fungal hypothermia? Mushrooms are considered the  
218 reproductive organ of mycelium, and their relatively cold temperature are proposed to be important in  
219 spore release (10, 11). Spore discharge is trigger by the mass and momentum transfer of microscopic  
220 drops of fluids on the spore surface (aka Buller's drop) (21). Buller's drop is formed by the condensation  
221 of water from the moist air (22). The increased surface area by the gills is believed to enhance the airflow  
222 and water condensation, further favoring spore detachment (10). In addition to spore discharged, cold  
223 temperatures could have a more fundamental role in fungal sporogenesis. There are many examples in



224 nature were sporogenesis is associated with cold temperatures (i.e., human spermatogenesis). Fungal  
225 hypothermia may be a biological advantage related to DNA recombination fidelity.

226         Understanding the mechanisms of fungal thermoregulation is important for the development and  
227 optimization of novel biotechnologies and biomaterials. Our data shows that the relatively high  
228 transpiration rate of mushrooms could be exploited to develop a natural air-conditioning device. Our data  
229 is consistent with previous reports (10) and suggests that mushrooms can be used to develop a passive  
230 air-cooling system. Mushroom-based air cooling depended on the relative humidity, and for detached *A.*  
231 *bisporus* mushroom pilei, evaporative cooling is compromised at relative humidity close to 60%.  
232 Subsequently, the transpiration rate of mushrooms can be used to humidify the surrounding air. Better  
233 results could be achieved using mushroom species with higher transpiration rates, still attached to their  
234 mycelium, and on a device that regulates the accumulation of moisture. Mushrooms can be used not only  
235 to cool the surrounding air but also to humidify and even purify it without electricity and CO<sub>2</sub> emissions.  
236 These findings suggest the possibility of using massive myco-cultures for cooling selected environmental  
237 areas and even the planet. For example, extensive myco-culture in soils shaded by forests could reduce  
238 the temperatures of these locales that could mitigate global warming trends, at least locally. Given that  
239 fungi live on soils and comprise 2% of the earth biomass (3), that fungi are 2-4 °C cooler than their  
240 environment, that the average surface temperature of the earth is ~14 °C (23), and assuming linearity in  
241 heating and cooling, we estimate that without fungi the temperature of the planet would be 0.25-0.5%  
242 warmer.

243         In conclusion, this study reveals the cold nature of fungal organisms and evaporative cooling as a  
244 fundamental mechanism for heat loss and thermoregulation for this kingdom. Fungal hypothermia implies  
245 that their heat loss is much greater than the production of heat via metabolism. Their relative cold  
246 temperatures also imply that the flow of surrounding thermal energy will move towards the fungus. The  
247 high-water content and transpiration rate of fungi implies that their molecular composition and structure  
248 enables the efficient transfer of thermal energy and water. Infrared imaging enables the study of  
249 mushrooms, molds, and yeasts as novel model systems to study thermal biology and thermodynamics at  
250 the community level. A yeast model to study thermal biology is interesting as it could allow the screening  
251 of genetic and epigenetic mechanisms regulating thermodynamics and thermal fitness. Understanding  
252 how fungal organisms dissipate heat can inspire novel biotechnologies for air-conditioning and the  
253 building of infrastructures.

## 254 **Materials and Methods**

255 All wild mushrooms specimens were obtained from Lake Roland Park in the State of Maryland  
256 during the evenings of July 5, 6, and 9<sup>th</sup> of 2019. Partial and non-official identification of specimens was  
257 made based on a visual inspection and photograph analysis via crowdsourcing the Internet. *Candida*  
258 spp., *Clodosporium* spp., and *Penicillium* spp. were obtained from mosquito gut isolates by the  
259 Dimopoulos Laboratory at the MMI Dept. *Rhodotorula mucilaginosa* was isolated from a contaminated  
260 YPD agar plate in our laboratory. *C. neoformans* Serotype A strain H99 (ATCC 208821), acapsular cap59  
261 mutant yeasts and *Penicillium* spp. molds were grown in Sabouroaud Dextrose agar or liquid media for 3-  
262 5 days at 30 °C and 24 °C, respectively. *Pleurotus ostreatus* was purchase from The Mushroomworks  
263 (Baltimore, MD) as an already-inoculated substrate contained in a 6-pound clear filter patch bag. Fruiting  
264 was triggered by making a single 4-inch side cut on the bag and let standstill at 24 °C for seven days.  
265 Mushroom flush was detached from mycelium on day four after it started fruiting. Light and dark *Agaricus*  
266 *bisporus* were purchased from New Moon Mushrooms (Mother Earth, LLC., Landenberg, PA, USA) and  
267 L. Pizzini & Son, Inc. (Landenberg, PA, USA), respectively.

268 **Thermography.** Wild mushroom temperatures were measured using a FLIR C2 IR camera (FLIR  
269 Systems, Wilsonville, OR). The camera specifications are 80x60-pixel thermal resolution; 640x480-pixel  
270 visual camera resolution; 7.5-14 µm spectral range of camera detector; object temperature range of -10 to  
271 150 °C, accuracy ±2 °C or 2%, whichever is greater, at 25 °C nominal; thermal sensitivity: <0.10 °C;  
272 adjusted emissivity to 0.96. The ambient temperature was derived from a card-containing black vinyl  
273 electrical tape with an emissivity of 0.96 and aluminum foil (emissivity 0.03). The black tape and  
274 aluminum foil were included in the picture as a reference for ambient and reflective temperature readings,  
275 respectively (**Fig. S6 a**). How effective is the black vinyl tape to reproduce ambient temperatures? This  
276 was tested by thermal imaging of the reference card following ~20 minutes incubation inside three  
277 temperature-controlled rooms, set to approximately 5, 25, and 38 °C. The temperature readings obtained  
278 from the black tape using the thermal camera were 5.2 (5.2/5.4 min/max), 25.5 (25.5/25.5 min/max), and  
279 37.9 (37.7/38.1 min/max) °C, respectively; demonstrating that black tape radiative temperature  
280 corresponded to the ambient temperature. The temperature readings between the thermal camera and a  
281 mercury thermometer matched clearly (**Fig. S6 b**), confirming that black tape radiative temperature  
282 matched the temperature of rooms, hence serving as a useful reference for ambient temperature.

283 The thermography of yeast and molds colonies/biofilms was done similar to was described  
284 previously (13). Thermal images of yeast, molds, and commercial mushrooms (*P. ostreatus* and *A.*  
285 *bisporus*) were taken inside a white Styrofoam box (30 x 27 x 30 mm, and 3.5 mm wall thickness) to  
286 prevent heat loss and radiation noise from surroundings. Prior to imaging yeasts and mold specimens,  
287 the sample plates were incubated at 45 or 37 °C. This incubation was required to detect a temperature  
288 difference between the colony and the agar as dictated by our thermal camera resolution. Following 1-  
289 hour incubation period, the yeast/mold containing plates were immediately transferred inside a Styrofoam  
290 box. Next, the box was closed with a lid having a hole fitted to a FLIR C2 IR camera (FLIR Systems,

291 Wilsonville, OR). The camera detector is set at 2.5 nm distance from the specimen. The temperature of  
292 the *P. ostreatus* mushroom flush was monitored during heating and cooling by placing the mushroom  
293 inside a warm room (37 °C, <10% RH) or cold room (4 °C, ~30% RH) for 137 and 104 minutes,  
294 respectively. Thermal images of mushroom flush were taken inside the Styrofoam box at different time  
295 intervals. All apparent temperatures of yeasts, molds, and mushrooms were obtained from infrared  
296 images using the FLIR Tool analysis software Version 5.13.17214.2001. Plot profiles of thermal images  
297 were obtained using the ImageJ software.

298 **Water condensation of fungal biofilms.** *C. neoformans* yeast biofilms were prepared by  
299 spotting 25 µL of a liquid 2-day old pre-culture onto Saboureaud agar medium. The liquid pre-cultures  
300 were inoculated from a frozen stock and grown for two days at 30 °C (shaking at 180 rpm). *Penicillium*  
301 spp. biofilm is naturally formed by inoculating on a Saboureaud agar plate. Yeast and mold-inoculated  
302 plates were grown upright at 24 °C for 1-2 weeks or until water condensation on the lids became visible.  
303 The amount of condensed water at the lid above a mold's biofilm or plain agar was collected using a  
304 Steriflip® filter vacuum unit (Millipore Sigma) connected to two 50 mL conical tubes; one at each end.  
305 Suction was achieved by connecting a small tubing across the filter into one of the conical tubes. A pipet  
306 tip connected at the end of tubing facilitated the aspiration of condensed water droplets on the lid and its  
307 collection into one of the 50 mL conical for weighting. The water mass was normalized by the  
308 condensation area on the lid, which was estimated from digital images using the ImageJ software.

309 **Mushroom dehydration.** Mushrooms were dehydrated for five days using a freeze-drying  
310 system (Labcono, Kansas City, MO).

311 **Thermocouple-thermometry of pilei.** To monitor the temperature of *A. bisporus* mushrooms as  
312 a function of time, mushroom pilei of equal masses, kept at 24 °C, were placed on glass trays inside  
313 ziplock clear bags (one mushroom per bag). One bag contained 40 grams of desiccating-anhydrous  
314 indicating Drierite (W.A. Hammond Drierite Company, LTD), and a second contained 40 grams of distilled  
315 water. Thermocouple detectors (K-type) were submerged inside each mushroom cap (centered from top).  
316 Bags were then closed and placed inside a warm room (37 °C, <10 % RH), and temperature readings  
317 were recorded every second using the Amprobe TMD-56 thermometer (0.05% accuracy) connected to a  
318 computer. Each mushroom sample was measured individually inside the warm room.

319 **A mushroom-based cooling device.** A prototype for a mushroom-based air-cooling device or  
320 MycoCooler™ is showed in (Figure 4a). The prototype device was made using a Styrofoam box with  
321 dimensions 20 x 21 x 21 cm or a total volume of 8820 cm<sup>3</sup>. An inlet aperture of 1-cm diameter and an  
322 outlet aperture of 2-cm diameter at opposite ends of the box allowed air flow inside and outside the box  
323 containing mushrooms (Fig S5a). An exhaust fan (Noctua NF-P12) was glued outside the box on top of  
324 the outlet aperture to facilitate the circulation of air (air flow rate of approximately in and out the  
325 MycoCooler™ (Fig S5b). Approximately, 420 grams of fresh *A. bisporus* mushrooms were placed inside  
326 the MycoCooler™ box, which was then closed, and placed inside a larger Styrofoam box with dimensions  
327 (30.48 x 30.48 x 30.48 cm or a total volume of 28.32 L (28,316.85 cm<sup>3</sup>). This larger box was maintained

328 inside a warm room (37 °C, <10 % RH) throughout the experiment. The MycoCooler™ containing  
329 mushrooms was enclosed inside the larger box once the temperature and humidity values reached  
330 steady state. The temperature and relative humidity inside the larger Styrofoam box (**Figure S5a**) were  
331 recorded every minute using an Elitech GSP-6 data logger having a temperature accuracy of ±0.5 °C (-  
332 20~40 °C) and humidity range 10%~90% and an accuracy of ±3% RH (25 °C, 20%~90% RH).

333 **Quantification and statistical analysis.** Details for each statistical analysis, precision measures,  
334 the exact value of n (and what n represents; sample size and the number of replicates) for all shown data  
335 can be found in the figure legends. We used an alpha level of 0.05 for all statistical tests.

336 To calculate the mushroom's cooling capacity, we used the MycoCooler temperature change data  
337 to estimate the cooling capacity of 420 g of *A. bisporus* mushroom pilei. Cooling capacity was calculated  
338 using the energy equation for heat transfer  $Q = m \times C_p \times \Delta T$ , where  $m$  is the mass flow rate of air in kg/s,  
339  $C_p$  is specific heat capacity of air in kJ/kg\*K, and  $\Delta T$  is the temperature difference in Kelvin. The  
340 mass flow rate of air was obtained by multiplying the density of air at 37 °C (1.006 kJ/kg\*K) by the fan  
341 flow rate, 0.026 m<sup>3</sup>/s (taken from equipment specifications). This results in a mass flow rate of 0.02 kg/s,  
342 that if multiplied by the heat capacity nominal value of air at 305.15 K (1.006 kJ/kg\*K) and the air  
343 temperature difference of the enclosed system before and 45 minutes after the addition of mushrooms  
344 (37 °C +273.15) – (27 °C +273.15=10 K). This yields a heat transfer or cooling capacity of ~ 20 Watts or  
345 68 British thermal units per hour (BTU/h). This divided by the mass of mushrooms 0.42 kg yields ~68  
346 Watts/kg.

347 To estimate the temperature of Earth without fungi, we considered the average temperature  
348 difference of wild mushrooms, which ranged from ~2-5 °C, and multiply it by the estimated amount of  
349 fungal biomass, ~2% (3), such that the temperature associated to the fungi would be ~0.04 - 0.1 °C. We  
350 then estimated the global mean surface temperature without the fungal biomass,  $X=15\text{ °C} + (0.04\text{ or }0.1$   
351 °C), such that global temperatures would be ~15.04 °C or ~15.1 °C, or ~0.3-0.7 % warmer.

## 352 **Acknowledgements**

353 The research was supported by the National Institutes of Health (R01 AI052733). We thank Teporah  
354 Bilezikian for helping with the identification of wild mushroom species and field work. The Baltimore  
355 Fungal Group and The Casadevall Laboratory members Samuel dos Santos and Daniel Smith for  
356 valuable input.

## 357 REFERENCES

- 358 1. Gates DM (1980) *Biophysical Ecology* (Springer New York, New York, NY).  
359 2. Lineweaver CH, Egan CA (2008) Life, gravity and the second law of thermodynamics. *Phys Life*  
360 *Rev* 5(4):225–242.  
361 3. Bar-On YM, Phillips R, Milo R (2018) The biomass distribution on Earth. *Proc Natl Acad Sci USA*  
362 115(25):6506–6511.  
363 4. Mahan JR, Upchurch DR (1988) Maintenance of constant leaf temperature by plants—I.  
364 Hypothesis-limited homeothermy. *Environ Exp Bot* 28(4):351–357.  
365 5. Jackson RD (1982) in *Advances in Irrigation*. (Elsevier), pp 43–85.  
366 6. Doughty CE, Goulden ML (2008) Seasonal patterns of tropical forest leaf area index and CO<sub>2</sub>  
367 exchange. *J Geophys Res* 113(G1).  
368 7. Still C, et al. (2019) Thermal imaging in plant and ecosystem ecology: applications and challenges.  
369 *Ecosphere* 10(6).  
370 8. Fischer MWF, Money NP (2010) Why mushrooms form gills: efficiency of the lamellate  
371 morphology. *Fungal Biol* 114(1):57–63.  
372 9. Mahajan PV, Oliveira FAR, Macedo I (2008) Effect of temperature and humidity on the  
373 transpiration rate of the whole mushrooms. *J Food Eng* 84(2):281–288.  
374 10. Dressaire E, Yamada L, Song B, Roper M (2016) Mushrooms use convectively created airflows to  
375 disperse their spores. *Proc Natl Acad Sci USA* 113(11):2833–2838.  
376 11. Husher J, et al. (1999) Evaporative cooling of mushrooms. *Mycologia* 91(2):351–352.  
377 12. Paul Stamets (2016) Thermal Amanita muscaria. Available at:  
378 <http://paulstamets.com/videos/thermal-amanita-muscaria> [Accessed January 2, 2020].  
379 13. Cordero RJB, et al. (2018) Impact of yeast pigmentation on heat capture and latitudinal  
380 distribution. *Curr Biol* 28(16):2657–2664.e3.  
381 14. Krahl F-S, et al. (2019) European mushroom assemblages are darker in cold climates. *Nat*  
382 *Commun* 10(1):2890.  
383 15. Pinkert S, Zeuss D (2018) Thermal Biology: Melanin-Based Energy Harvesting across the Tree of  
384 Life. *Curr Biol* 28(16):R887–R889.  
385 16. Tabata K, et al. (2013) Measurement of soil bacterial colony temperatures and isolation of a high  
386 heat-producing bacterium. *BMC Microbiol* 13:56.  
387 17. Utsumi Y, et al. (2019) Acetic Acid Treatment Enhances Drought Avoidance in Cassava (*Manihot*  
388 *esculenta* Crantz). *Front Plant Sci* 10:521.  
389 18. Vaz JA, et al. (2011) Chemical composition of wild edible mushrooms and antioxidant properties of  
390 their water soluble polysaccharidic and ethanolic fractions. *Food Chem* 126(2):610–616.  
391 19. Maxson ME, Cook E, Casadevall A, Zaragoza O (2007) The volume and hydration of the  
392 *Cryptococcus neoformans* polysaccharide capsule. *Fungal Genet Biol* 44(3):180–186.  
393 20. Wilkinson JF (1958) The extracellular polysaccharides of bacteria. *Bacteriol Rev* 22(1):46–73.  
394 21. Turner JCR, Webster J (1991) Mass and momentum transfer on the small scale: how do  
395 mushrooms shed their spores? *Chem Eng Sci* 46(4):1145–1149.  
396 22. Webster J, Davey RA, Ingold CT (1984) Origin of the liquid in Buller's drop. *Transactions of the*  
397 *British Mycological Society* 83(3):524–527.  
398 23. Hansen J, Ruedy R, Sato M, Lo K (2010) GLOBAL SURFACE TEMPERATURE CHANGE. *Rev*  
399 *Geophys* 48(4).

400

401 **Figures and Tables**

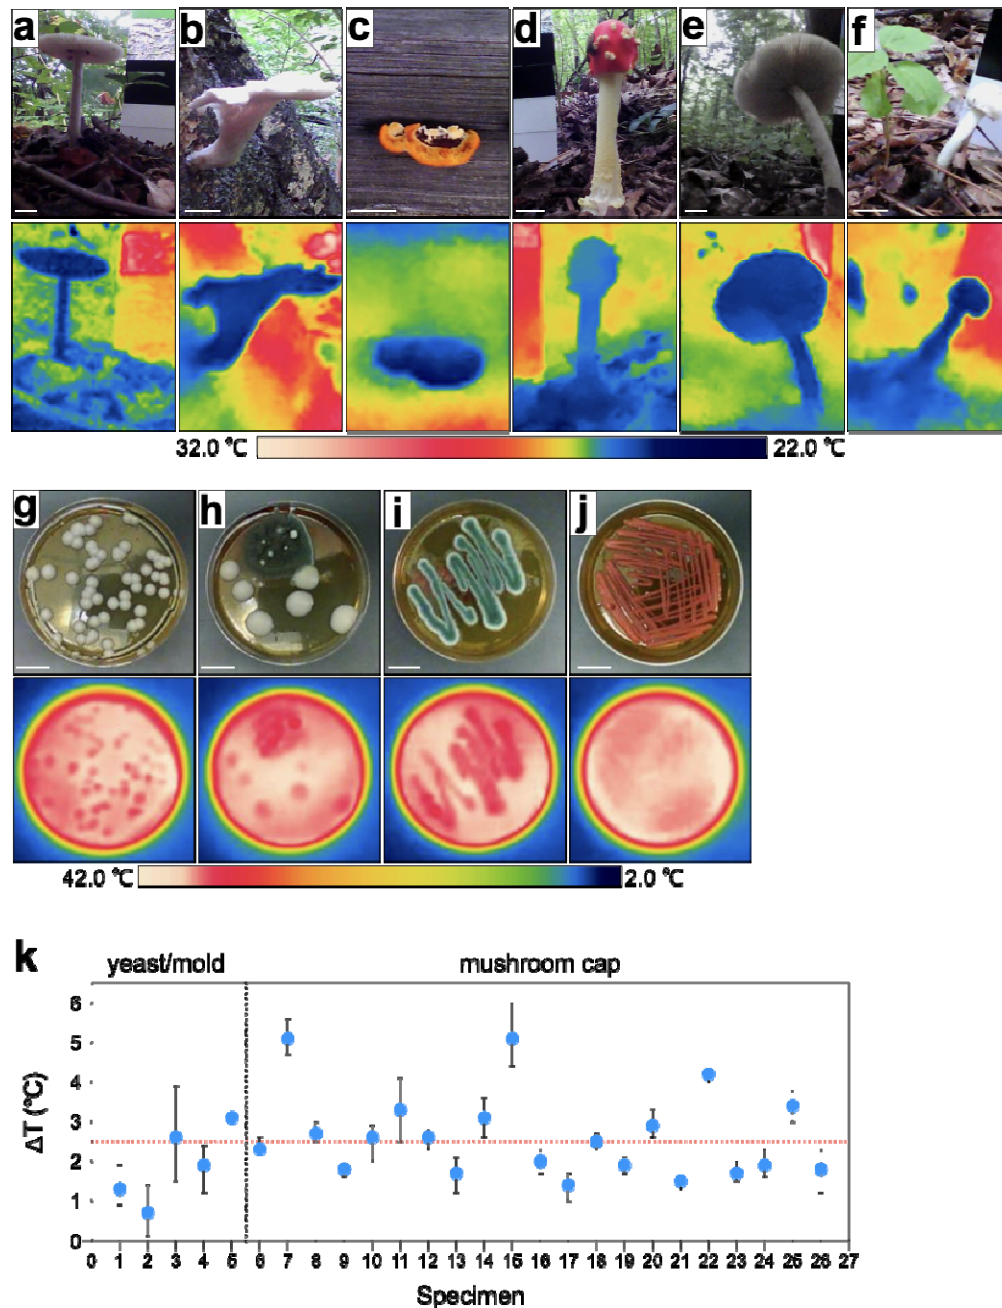

402

403 **Figure 1. Yeasts, molds, and mushrooms are colder than their environment.**

404 thermographic examples of wild mushrooms imaged in their natural habitat: (a) *Amanita* spp., (b)

405 *Pleurotus ostreatus*, (c) *Pycnoporus* spp., (d) *Amanita muscaria* (e) *Amanita brunnescens*, (f) *Russula*

406 spp. (g) yeast *Candida* spp. (also seen in b as white colonies), (h) mold *Cladosporium sphaerospermum*

407 (dark colony), (i) mold *Penicillium* spp., and (j) yeast *Rhodotorula mucilaginosa*. (k) The temperature

408 difference between the surrounding/ambient and fungal specimen. Error bars represent standard

409 deviation. The temperature values of all fungal specimens and surroundings are listed in **Table S1**.

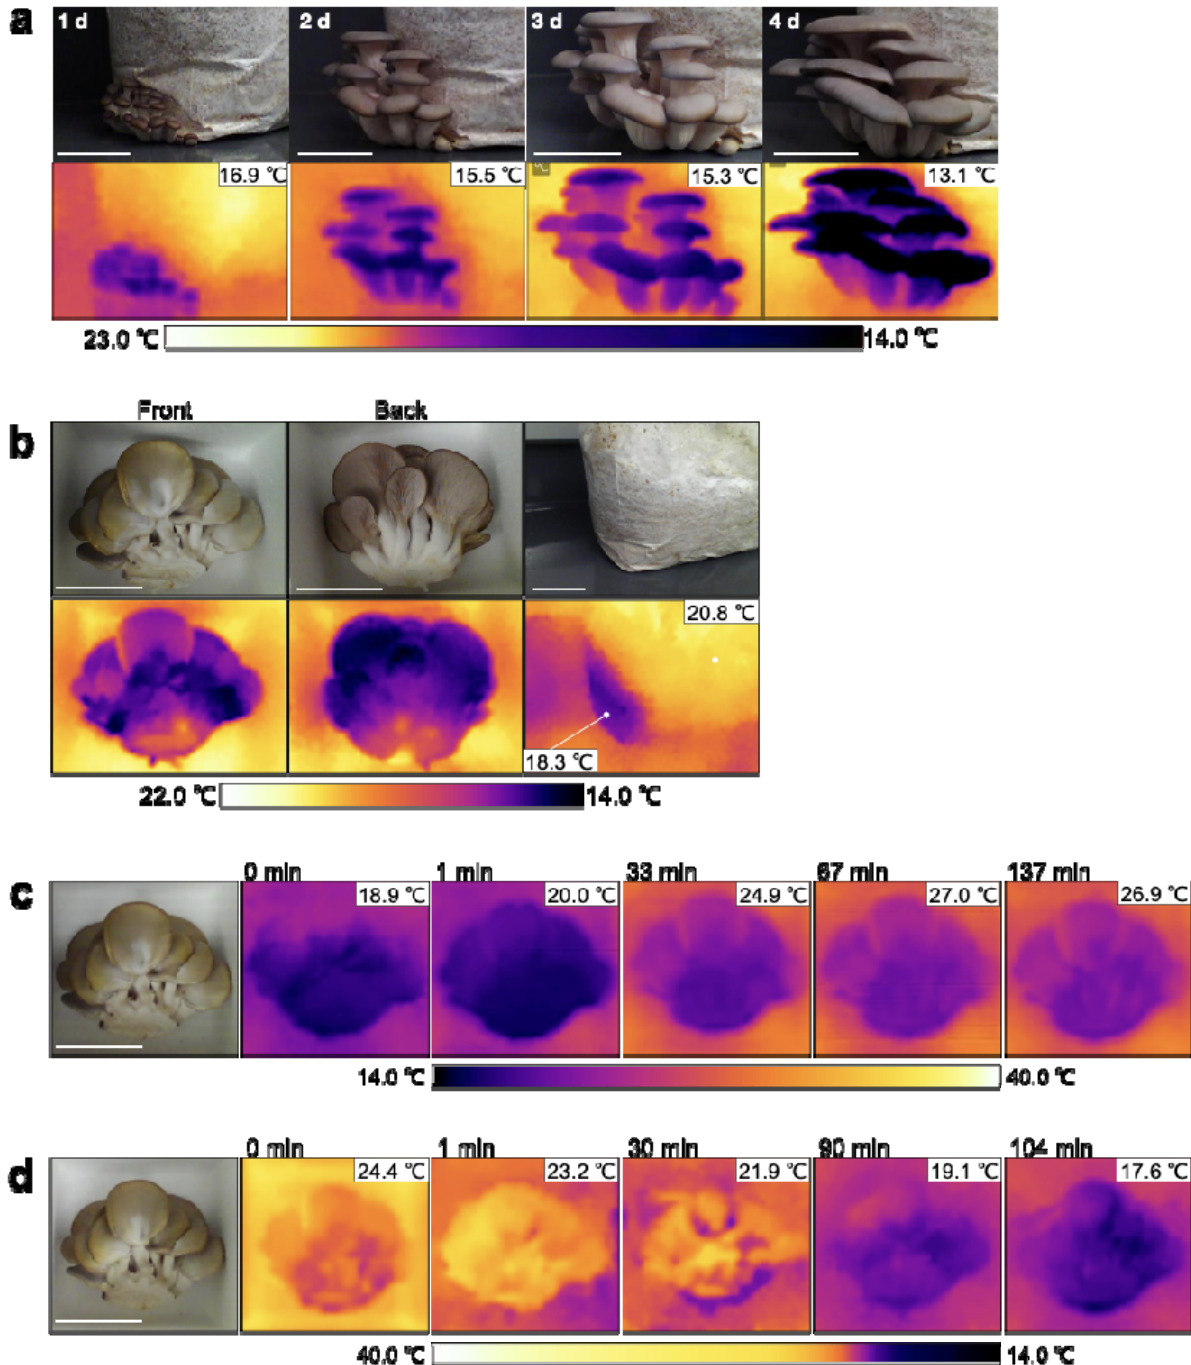

410

411 **Figure 2. The mushroom temperature during fruiting and during heating and cooling.**

412 (a) Visible and thermal images of *Pleurotus ostreatus* during fruiting at temperature-controlled room ( $22 \pm$   
413  $5^\circ\text{C}$ , 50% RH). Inset temperature values correspond to the lowest temperature signal registered in the  
414 thermograph. (b) Frontal and back imaging of mushrooms and mycelium bag after detachment at day 4.  
415 Thermal imaging of *P. ostreatus* following incubation inside (c) warm room at  $37^\circ\text{C}$ , <10% RH followed  
416 by incubation inside (d) cold room at  $4^\circ\text{C}$ , ~30% RH. Inset temperature values correspond to the lowest  
417 and highest temperature signal in the thermographs in (c) and (d), respectively.



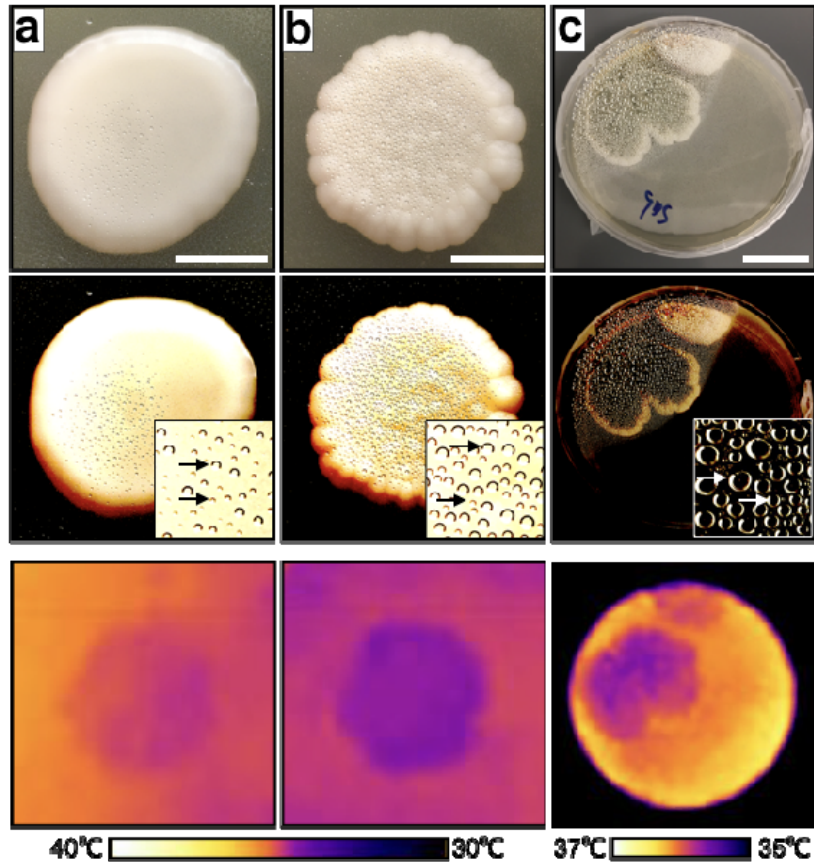

418  
419

420 **Figure 3. Evaporative cooling in yeast and mold biofilms.**

421 Evidence for evaporative cooling is observed from the condensed water droplets at the lid of petri dish on  
422 top of colony/biofilm. Visible (top and middle) and thermal images (bottom) of (a) wildtype H99  
423 *Cryptococcus neoformans*; scale bar 1 cm; (b)  $\Delta cap59$  acapsular mutant of *C. neoformans*; scale bar 1  
424 cm, and (c) normal *Penicillium* spp.; scale bar 3 cm. Visible images were altered to increase contrast and  
425 help visualize water droplets (middle row).

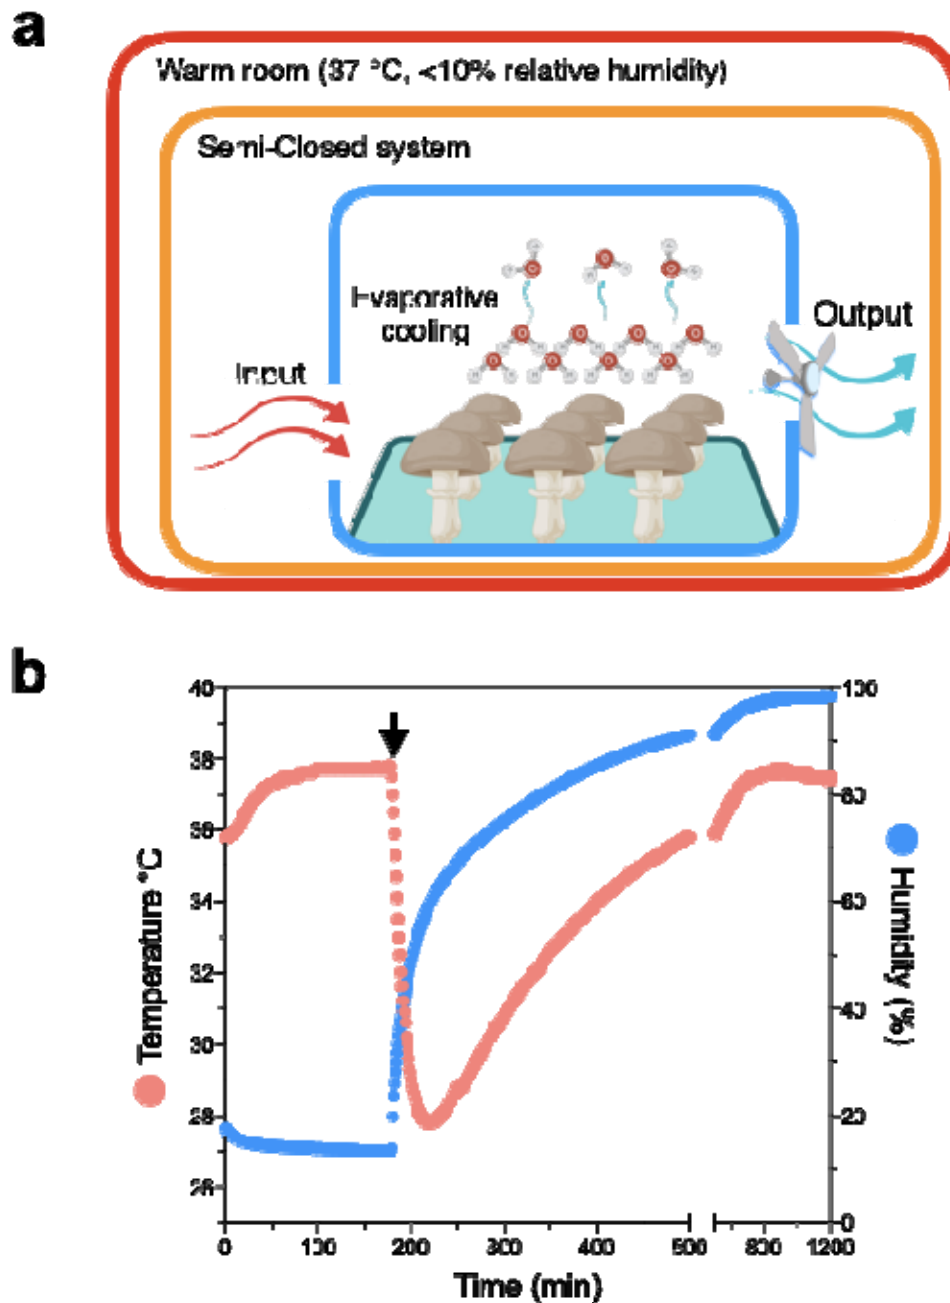

426

427 **Figure 4. Proof-of-concept of a mushroom-based air conditioning system.**

428 (a) Prototype diagram model of MycoCooler™ air conditioning system. Warm air enters an insulated  
429 chamber containing mushrooms. As the warm air flows inside the chamber, mushroom-mediated  
430 evaporative cooling will cool the air. An exhaust fan will push the cooled air through a HEPA filter to limit  
431 spore dispersal and enhance air circulation. The fan can be powered via a photovoltaic cell making this  
432 system free of carbon emissions. (b) Input and output air temperature and relative humidity as a function  
433 of time. A MycoCooler™ prototype was placed inside a semi-closed Styrofoam box. Mushrooms were  
434 added once the temperature inside the semi-closed system reached steady-state (black arrow).
